# Supplementary material for: Generating Flavor Molecules Using Scientific Machine Learning
Source: PubMed Central journal article supplement (PMC10061502; doi:10.1021/acsomega.2c07176), 2023-03-15
Supplement: ao2c07176_si_001.pdf [file ao2c07176_si_001.pdf]

# Generating flavor molecules using Scientific Machine Learning

Luana P. Queiroz<sup>1,2</sup>, Carine M. Rebello<sup>3</sup>, Erbet A. Costa<sup>3</sup>, Vinícius V. Santana<sup>1,2</sup>, Bruno C. L. Rodrigues<sup>1,2</sup>, Alírio E. Rodrigues<sup>1,2</sup>, Ana M. Ribeiro<sup>1,2</sup> and Idelfonso B. R. Nogueira<sup>4,\*</sup>

1 LSRE-LCM - Laboratory of Separation and Reaction Engineering – Laboratory of Catalysis and Materials, Faculty of Engineering, University of Porto, Rua Dr. Roberto Frias, 4200-465 Porto, Portugal;

2 ALiCE - Associate Laboratory in Chemical Engineering, Faculty of Engineering, University of Porto, Rua Dr. Roberto Frias, 4200-465 Porto, Portugal;

3 Departamento de Engenharia Química, Escola Politécnica (Polytechnic Institute), Universidade Federal da Bahia, Salvador 40210-630, Brazil;

4 Chemical Engineering Department, Norwegian University of Science and Technology, Sem Sælandsvei 4, Kjemiblokk 5, Trondheim, Norway;

\*To whom correspondence should be addressed: *idelfonso.b.d.r.nogueira@ntnu.no*

## Supporting Information

Table S1 - Pytorch default parameters' values for Adam optimizer.

| Parameters     | Learning rate         | Betas        | Eps                   | Weight decay | AMSGrad | Maximize |
|----------------|-----------------------|--------------|-----------------------|--------------|---------|----------|
| Default values | $1.00 \times 10^{-3}$ | (0.90, 0.99) | $1.00 \times 10^{-8}$ | 0.00         | False   | False    |

The defined hyperparameters are presented in the following table, Table S2.

Table S2 - Deep generative model hyperparameters.

| Parameters                     | Deep Generative Model's Value |
|--------------------------------|-------------------------------|
| $\alpha$                       | -                             |
| Batch size                     | 20                            |
| Block size                     | 1000                          |
| Epochs                         | 1000                          |
| Generation epoch               | 790                           |
| GGNN activation function       | SELU                          |
| GGNN depth                     | 4                             |
| GGNN dropout probability       | 0                             |
| GGNN hidden dimension          | 250                           |
| GGNN width                     | 100                           |
| Initial learning rate          | $1.00 \times 10^{-4}$         |
| Learning rate decay factor     | 0.99                          |
| Learning rate decay interval   | 10                            |
| Loss function                  | Kullback-Leibler divergence   |
| Maximum relative learning rate | 1.00                          |
| Message passing layers         | 3                             |

|                                          |                       |
|------------------------------------------|-----------------------|
| Message size – input size of GRU         | 100                   |
| Minimum relative learning rate           | $1.00 \times 10^{-4}$ |
| MLP activation function                  | SoftMax               |
| MLP depth (Layers 1 and 2)               | 4                     |
| MLP dropout probability (Layers 1 and 2) | 0                     |
| MLP hidden dimension (Layers 1 and 2)    | 500                   |
| Number of samples                        | 200                   |
| Optimizer                                | Adam                  |
| $\sigma$                                 | -                     |
| Weight decay                             | 0                     |
| Weight initialization                    | Uniform               |
